# Supplementary material
Source: HighWire-hosted journal article supplement (https://www.cmajopen.ca/highwire/filestream/87597/field_highwire_adjunct_files/1/open-2021-0026-original-submission.pdf)
Supplement: open-2021-0026-original-submission.pdf [file open-2021-0026-original-submission.pdf]

1  
2  
3 **Title:** College complaints against resident physicians in Canada: a retrospective review of Canadian  
4  
5 Medical Protective Association data from 2013 to 2017  
6  
7

8 **Authors:** Charlotte Crosbie MD JD<sup>1</sup>; Allan McDougall MA PhD<sup>2,3</sup>; Harpreet Pangli MD<sup>4</sup>; Riyad B. Abu-  
9  
10 Laban MD MHSc<sup>1</sup>; Lisa A. Calder MD MSc<sup>2,5</sup>  
11

12 <sup>1</sup>University of British Columbia, Department of Emergency Medicine, Diamond Health Care Centre 11<sup>th</sup>  
13  
14 floor, 2775 Laurel Street, Vancouver, BC, V5Z 1M9  
15  
16

17 <sup>2</sup>The Canadian Medical Protective Association, 875 Carling Avenue, Ottawa, ON, K1S 5P1  
18

19 <sup>3</sup>University of Ottawa, Department of Education, 145 Jean Jacques Lussier, Ottawa, ON, K1S 5N8  
20

21 <sup>4</sup>University of British Columbia, Faculty of Medicine, Division of Plastic Surgery, Diamond Centre 3<sup>rd</sup>  
22  
23 floor, 2775 Laurel Street, Vancouver, BC, V5Z 1M9  
24  
25

26 <sup>5</sup>Ottawa Hospital Research Institute, Clinical Epidemiology Program, 1053 Carling Avenue, Ottawa, ON,  
27  
28 K1Y 4E9  
29  
30

31  
32  
33 **Corresponding author:** Dr. Lisa A. Calder ([research@cmpa.org](mailto:research@cmpa.org)), Canadian Medical Protective Association,  
34  
35 875 Carling Avenue, Ottawa, Ontario, Canada K1S 5P1, Tel: 613-725-2000, Fax: 613-725-1300  
36  
37  
38

39 **Funding statement:** This study was internally funded by the Canadian Medical Protective Association.  
40  
41  
42  
43

44 **Declaration of authors' competing interests:** Co-authors A.M and L.A.C. were employees of the CMPA  
45  
46 at the time of this study, a not-for-profit mutual defence organization for physicians. The other co-  
47  
48 authors (C.C., H.P., and R.B.A.) do not have any competing interests to disclose.  
49  
50  
51  
52  
53  
54  
55  
56  
57  
58  
59  
60

## ABSTRACT

**Background:** An understanding of regulatory complaints against resident physicians is important for practice improvement. We aimed to describe the nature of regulatory College complaints against resident physicians using Canadian Medical Protective Association data.

**Methods:** We conducted a retrospective descriptive study of College complaint cases closed between by the Canadian Medical Protective Association (CMPA), a mutual medico-legal defense organization for over 99,000 physicians, representing an estimated 95% of Canadian physicians. Eligible cases involved  $\geq 1$  resident physicians and closed between 2008-2017 (for time trends) or 2013-2017 (descriptive analyses).

**Results:** Trend analysis showed the number of College complaints involving residents increased significantly ( $p=0.0032$ ) from 5.4 per 1,000 residents in 2008 to 7.9 per 1,000 in 2017 (average annualized increase=5.0%,  $P<0.0001$ ). For cases from the descriptive analysis (2013-2017), the top reason for complaint was deficient patient assessment (69/142; 48.6%). Some patients (22/142; 15.2%) experienced severe outcomes. Most cases (139/142; 97.9%) did not result in severe sanctions for the resident. A thematic analysis of complaints found 106/163 (65.0%) involved a clinical problem, 95/163 (58.3%) a relationship problem (e.g. communication), and 67/163 (41.1%) a professionalism problem. In College decisions, only 36/163 (22.1%) had the theme of clinical problem, 66/163 (40.5%) a patient-physician relationship problem, and 63/163 (38.7%) a professionalism problem. In 63/163 (38.7%) the College had no criticism.

**Interpretation:** Problems with communication and professionalism feature prominently in resident College complaints. Thematic analysis demonstrated the potential for mismatch between patient and healthcare provider perceptions of care. These results may direct medical education to areas of potential practice improvement.

## INTRODUCTION

Canadian physician regulatory bodies serve the public by regulating the medical profession in accordance with legislation in each province or territory. These bodies are known as the Colleges of Physicians and Surgeons of each province, or the Medical Council or Department of Health and Social Services in the Territories (hereafter referred to as “Colleges”). Practicing physicians and postgraduate trainees (residents and fellows) must hold a practice or educational license from the College in the province or territory in which they practice or study.

As part of their mandate to protect patients and the public interest, most Colleges must investigate complaints concerning physicians. Complaints can be filed by any member of the public (including patients and their families), other healthcare professionals or administrators. Complaints can relate to incidents both inside and outside the workplace. Each College has a distinct process for investigating complaints. This typically involves gathering information from the complainant, the physician, and other sources (including peer expert consultants) if needed. The College then issues a decision. In some locations, this may include referral to a discipline committee for a hearing if the matter is deemed serious. There are a range of potential outcomes for physicians who are the subject of a College complaint. These include, but are not limited to, complaint dismissal, advice given to the physician, license suspensions and revocations.

The Canadian Medical Protective Association (CMPA) is a not-for-profit mutual defence association that assists physician members with medico-legal matters and aims to reduce medico-legal risk through improvements in the safety of care. If a physician member advises the CMPA of a College complaint, the CMPA may assist the member in responding to the matter. While CMPA data indicate that College complaints reported by all physician members have increased across Canada over the past ten years, (1-3) the trend for resident members is unknown. Furthermore, published work on regulatory complaints involving physicians in Canada is scant. Previous studies have examined disciplinary findings against

1  
2  
3 specific Canadian medical specialties, but these studies did not include residents.(3-9) Although these  
4  
5 studies represent a step towards learning more about College complaints, disciplinary findings are only  
6  
7 one possible physician outcome of a College complaint, and represent a small fraction of complaint  
8  
9 outcomes overall.(10)

11 It is critical to gain a better understanding of College complaints against residents for several reasons.

12  
13 First, better understanding patient complaints provides insight into problems in healthcare,(11) and may  
14  
15 also improve patient safety.(11-14) There is also evidence to suggest patient complaints may be  
16  
17 associated with defensive medicine, which is not necessarily beneficial to patient care.(15) Patient  
18  
19 complaints can also seriously impact physicians' psychological wellbeing.(16,17) Ultimately, a better  
20  
21 understanding of the nature of College complaints against resident physicians could benefit the medical  
22  
23 education community by identifying areas of practice improvement and helping target educational  
24  
25 initiatives to improve patient safety and professionalism, and in doing so mitigate medico-legal risk.  
26  
27

28  
29 The purpose of this study was to better understand the trends and nature of College complaints filed  
30  
31 against resident physicians. Our first objective was to examine how the rates of College complaints  
32  
33 involving residents have changed over 10 years relative to other physician members of the CMPA. Our  
34  
35 second objective was to describe and analyze a more recent sample of College complaints against  
36  
37 residents, including resident and patient demographic data, case characteristics, and themes across  
38  
39 College complaints.  
40  
41  
42  
43  
44  
45  
46

## 47 **METHODS**

### 48 **Data sources**

49  
50 At the time of this study, the CMPA had over 99,000 members, including 12,996 residents.  
51  
52

53  
54 Approximately 95% of Canadian physicians were members, who were thus eligible to seek medico-legal  
55  
56  
57  
58  
59  
60

1  
2  
3 advice and education from the Association. All service requests are voluntary. The CMPA maintains a  
4 repository of medico-legal data, routinely collected and coded when members involve the Association.  
5  
6 Post postgraduate residents in Canada are members of the CMPA, with the exception of most residents  
7 practicing in the province of Québec (N = 3892 based on 2016-2017 data from the Canadian Post-M.D.  
8 Education Registry). Eligible CMPA data were organized by case, each of which represents an instance  
9 during which a physician or multiple physicians contacted the CMPA after being named in a College  
10 complaint. To capture and characterize key details about these cases, medical analysts, who are  
11 experienced registered nurses, reviewed closed cases and coded specific clinical details using the  
12 Canadian enhancement to the International Statistical Classification of Diseases and Related Health  
13 Problems (18) and the Canadian Classification of Health Interventions.(19) They also coded the level of  
14 patient harm using an in-house classification system based on the American Society for Healthcare Risk  
15 Management’s “Healthcare Associated Preventable Harm Classification”.(20) To reduce  
16 misclassification, analysts conducted quality assurance reviews of coding on a weekly basis.  
17  
18  
19  
20  
21  
22  
23  
24  
25  
26  
27  
28  
29  
30  
31  
32

### 33 **Study design**

34  
35 In this study, we conducted retrospective analyses of College complaints involving  $\geq 1$  resident. We  
36 analyzed data from the national medico-legal repository of the CMPA, with an aim to describe and  
37 characterize College complaints involving resident doctors Canada.  
38  
39  
40  
41

### 42 **Case selection**

43  
44 Throughout the manuscript, we use the word “College complaint” to reflect complaints relating to  
45 patient care and those relating to Colleges opening investigations prompted from another source. We  
46 refer to College complaints as complaints to a provincial regulatory authority about a resident doctor.  
47  
48 This is a study of *closed cases*, meaning that a final outcome determined by a provincial regulator had  
49 been determined. We first identified College complaints involving Canadian residents over a 25-year  
50 period and 10-year period of closed cases from 1993-2017. For inclusion in the trend analysis, College  
51  
52  
53  
54  
55  
56  
57  
58  
59  
60

1  
2  
3 complaints must have been closed between January 1, 2008 and December 31, 2017. For inclusion in  
4  
5 our 5-year descriptive analysis of patient and physician demographic data, case characteristics, and  
6  
7 themes across College complaints, cases must have been closed between January 1, 2013 and December  
8  
9 31, 2017.  
10

11  
12 For our analysis of patient and physician demographic data, case characteristics, and themes across  
13  
14 College complaints, we excluded all cases where a College decision was not available. We also excluded  
15  
16 cases where a resident may have been named in a College complaint but upon further review, they were  
17  
18 not directly involved in that patient's care. Additionally we excluded cases where the resident was  
19  
20 not directly involved in that patient's care. Additionally we excluded cases where the resident was  
21  
22 practicing independently during the index occurrence, called "moonlighting" in some regions. We chose  
23  
24 periods longer than our five-year study period to demonstrate trends because medico-legal trends  
25  
26 typically change more slowly than healthcare trends.  
27

28  
29 College complaints involving patient care are routinely coded by CMPA analysts using international,  
30  
31 national and in-house coding frameworks.(21) Our analysis of resident and patient demographics as well  
32  
33 as case characteristics used these coded data. For our analysis of themes across College complaints, we  
34  
35 broadened the search criteria to include College complaints for any reason, not limited only to  
36  
37 complaints involving patient care (such as complaints from educational supervisors, administrative  
38  
39 personnel, or other healthcare providers).  
40  
41

#### 42 **Variables**

43  
44 To characterize resident and patient demographics, we extracted resident postgraduate year (PGY-year),  
45  
46 specialty, and age based on year of birth; the province of complaint; descriptive variables from the  
47  
48 patients included age and self-reported sex. To explore the characteristics of College cases, we extracted  
49  
50 the reason for complaint, complainant (i.e. academic, administrative personnel, other healthcare  
51  
52 provider, patient or advocate, other member of public), case outcome, whether the complaint was  
53  
54  
55  
56  
57  
58  
59  
60

1  
2  
3 reviewed or appealed; whether the complaint involved a procedure; and, whether the complaint  
4  
5 stemmed from a single episode of care versus multiple episodes of care.  
6  
7

### 8 **Thematic analysis**

9  
10 Our exploration of themes across complaints leveraged several existing frameworks. This involved an in-  
11  
12 depth analysis of the full medico-legal file of closed cases from 2013-2017 by the primary author (CC)  
13  
14 who is both a senior resident physician and a lawyer. For each complaint, themes underlying both the  
15  
16 complaint, the College's decision, and contributing factors were identified. We also explored level of  
17  
18 patient harm according to the ASHRM 7-point scale (**Appendix 2**). We considered patient harm as an  
19  
20 outcome that negatively affects a patient's health and/or quality of life. We used the Health  
21  
22 Communication Assessment Tool (HCAT), a validated tool for classifying healthcare complaints to inform  
23  
24 thematic classification.(22-24) When the nature of a College complaint or decision was not adequately  
25  
26 captured by HCAT, we categorized those complaints and decisions into separate pre-defined themes  
27  
28 agreed upon by the research team (**see Appendix 1** for theme definitions). For each complaint, themes  
29  
30 underlying both the complaint, the College's decision, and contributing factors were identified. Over 24  
31  
32 months, quarterly coding meetings took place between the coder and the second author (AM).  
33  
34 Disagreements on theme definitions were resolved during team coding meetings through discussion  
35  
36 until consensus.  
37  
38  
39  
40  
41

### 42 **Statistical methods**

43  
44 In order to determine how complaint rates have changed over time, we conducted a 10-year trend  
45  
46 analysis of cases closed from 2008-2017, comparing cases with  $\geq 1$  resident physician cases with  $\geq 1$  non-  
47  
48 resident physician(s). To allow comparison, we stratified all CMPA member physicians into two groups:  
49  
50 residents and non-resident physicians. We calculated each group's relative complaint rates per 1,000  
51  
52 physician members per year. We fitted a trend line for each physician group and calculated the  
53  
54 annualized growth rate based on the fitted trend. Statistical tests were two-tailed and we considered P  
55  
56  
57  
58  
59  
60

1  
2  
3 values < 0.05 to be statistically significant. We applied an ANOVA type III sum of squares test to  
4  
5 determine the statistical significance of the change over time for temporal trends from 2008 to 2017.  
6  
7

8 We used frequencies and proportions (for categorical variables) and medians and ranges (for continuous  
9  
10 variables) to characterize and to describe resident and patient demographic data, case characteristics,  
11  
12 and themes across College complaints for cases closed 2013-2017 that involved at least one resident.  
13

14 We completed all statistical analyses using SAS 9.4<sup>®</sup>. We do not report numbers less than 10 as doing so  
15  
16 could represent a risk to physician or patient confidentiality, and have consequently aggregated these  
17  
18 data.  
19  
20

## 21 22 **Ethics Approval**

23  
24 The Canadian ethics review panel of the Advarra (formerly Chesapeake) Institutional Review Board,  
25  
26 based in Aurora, Ontario and comprised of Canadian members, reviewed and approved the study in  
27  
28 compliance with Canada's Tri-Council Policy Statement on the Ethical Conduct for Research Involving  
29  
30 Humans (TCPS 2). Funding and support for this research was provided by the CMPA.  
31  
32  
33  
34  
35

## 36 **RESULTS**

### 37 38 **Trend analysis**

39  
40 The 10-year trend analysis identified 36,490 College complaint cases between 2008-2017. (Figure 2)

41  
42 Over the 10-year study period, the number of College complaints involving residents increased  
43  
44 significantly ( $p=0.0032$ ) from 5.4 per 1,000 residents in 2008 to 7.9 per 1,000 in 2017 (average  
45  
46 annualized increase=5.0%,  $P<0.0001$ ). This finding paralleled, although was significantly lower than  
47  
48 ( $P<0.0001$ ), the increase in College complaints across all CMPA members during the same period  
49  
50 (average annualized increase=6.3%,  $p=0.0008$ ).  
51  
52  
53  
54  
55  
56  
57  
58  
59  
60



### Resident and patient demographic data

The CMPA closed 33,780 medico-legal cases from January 2013 until December 2017. Of those, 20,109 were regulatory complaints, and 469 of those involved a resident (**Figure 1**). Our resident and patient demographic analysis included 142 cases that involved 145 patients (**Table 1**). The majority of cases (n = 66, 46.5%) occurred among patients admitted to hospital, 42 (29.6%) occurred in the emergency department, day surgery or a clinic affiliated with a hospital, and 37 (26.1%) occurred in an ambulatory care area outside the hospital (there was more than one care setting per complaint in some cases). Ontario represented 101/142 complaints (71.1%).

### Case characteristics

The top reasons for complaint involved deficient patient assessment, diagnostic error, and professionalism (**Table 2**). Of the 142 cases, 62 (43.7%) had no peer expert or College criticism and therefore no contributing factors assigned. For the 80 cases (56.3%) with contributing factors, we categorized the contributing factors as provider, team, or system factors. There was often more than one contributing factor per case. The majority of cases (n = 53, 66.3%) involved provider factors (**Table 3**). Cases involving team factors (n = 35, 43.8%) included documentation issues (20/35; 57.1%), communication breakdown with the patient (17/35; 48.6%), and communication breakdown between physicians (5/35; 14.3%). Of the 80 cases, (17.5%) 14 involved system factors. These included health information technology issues (2/14; 14.3%), office issues (4/14; 28.6%), protocol, policy and procedure issues (4/14; 28.6%), and resource issues (4/14; 28.6%).

Regarding healthcare related harm, 27 of 142 cases (19.0%) in the resident and patient demographic analysis involved errors in the diagnostic process leading to a misdiagnosis, a missed diagnosis, or a delay in diagnosis. The most common types of diagnostic error involved infectious processes and disorders (e.g. pneumonia, otitis media, appendicitis, abscesses); post-procedural complications (e.g. hemorrhage), and missed severity of injuries (e.g. fractured spine, foot). Fourteen of 142 of cases (9.9%)

1  
2  
3 involved injuries, and the most common injury involved laceration of blood vessels during an invasive  
4 procedure (e.g. central line insertion or thoracentesis) or during surgery. Among the 145 patients in the  
5  
6 142 cases, 22/145 (15.2%) experienced severe outcomes, including death in 13 cases (9.0%).  
7  
8  
9

10 The majority of complaints did not result in severe sanctions for the resident involved. Seventy-nine of  
11  
12 142 cases (55.6%) were dismissed for the resident with no further action taken, and 56 (39.4%) were  
13  
14 given an educational or remedial disposition. In 7 cases, residents received more severe sanctions  
15  
16 (4.9%).  
17  
18  
19

### 20 **Themes across College complaints**

21  
22 Our thematic analysis included a sampling of all College complaints against residents that were closed  
23  
24 between 2013-2017, meaning that a portion of the cases may not have involved a specific patient (i.e.  
25  
26 may have involved a professionalism issue that did not involve patient care). The thematic analysis  
27  
28 focused on a sample of 163/469 (34.7%) complaints involving a resident. Ontario represented 115/163  
29  
30 complaints (70.1%). The majority of complaints were filed by patients (57/163; 35.0%) and their  
31  
32 advocates (53/163; 32.5%). Approximately one third of cases (53/163; 32.5%) were filed by personnel  
33  
34 other than patients or their advocates. These included complaints filed by academic personnel (23/163;  
35  
36 14.1%), administration (12/163; 7.4%), other healthcare professionals (9/163; 5.5%), other members of  
37  
38 the public (7/163; 4.3%). One case was self-reported and one was unknown.  
39  
40  
41  
42

43 Cases included in the thematic analysis similarly did not lead to severe resident sanctions: 84 complaints  
44  
45 (51.5%) were dismissed with no further action taken and 60 complaints (36.8%) were given an  
46  
47 educational or remedial disposition. Conversely, 19 complaints (11.7%) resulted in severe sanctions,  
48  
49 which included voluntary resignation, suspension, limitations placed on practice, citation or written  
50  
51 caution, erased or revoked license, and remedial agreement. Several of the cases involving a suspension  
52  
53 also included limitations on practice once the resident returned to practice (e.g. cannot prescribe  
54  
55  
56  
57  
58  
59  
60

1  
2  
3 opioids, must take part in physician health program, must have chaperone present). A total of 25 cases  
4  
5 (25/163; 15.3%) were reviewed or appealed by the resident.  
6  
7

8 Out of the 110 cases that involved complaints filed by patients or their advocates, 10 (9.1%) involved a  
9  
10 complaint arising from an incident where a patient had more than one interaction (on separate dates)  
11  
12 with the resident and 29 of these cases (26.4%) involved procedures.  
13  
14

15 The most frequent theme in College complaints was clinical problems (106/163; 65.0%), whereas  
16  
17 patient-physician relationship problems was the top theme in College decisions (66/163; 40.5%). Over  
18  
19 one third of cases [63/163 cases (38.7%)] had no College criticism and were coded as groundless. **Table**  
20  
21 **4** provides complete information for how many times a theme (and subcategory of theme) was found in  
22  
23 College complaint allegations and College decisions.  
24  
25

26  
27 When examining College decision themes by outcome (**see Appendix 3**), the top 3 themes in College  
28  
29 decisions in cases that were dismissed with no further action taken were 1) groundless (60/84; 71.4%);  
30  
31 2) professionalism problems (12/84; 14.3%, with 7 being documentation issues); and 3) patient-  
32  
33 physician relationship (e.g. communication or respect) problems (11/84; 13.1%).  
34  
35

36 Of the 60/163 cases (36.8%) that were provided with an educational or remedial disposition, the top  
37  
38 three themes in College decisions were 1) patient-physician relationship problems (39/60; 65.0%); 2)  
39  
40 professionalism problems (32/60; 53.3%); and 3) clinical problems with quality or safety (29/60; 48.3%).  
41  
42

43 Of the 19/163 College decisions (11.7%) where there was concern expressed by the College and  
44  
45 sanctions imposed, the top three themes in College decisions were 1) professionalism problems (19/19;  
46  
47 100.0%); 2) patient-physician relationship problems (17/19; 89.5%); and 3) criminal, ethical or boundary  
48  
49 issues (such as fraud, prescription diversion, and driving while impaired) (13/19; 68.4%).  
50  
51  
52  
53  
54  
55  
56  
57  
58  
59  
60

## INTERPRETATION

Our results indicate that the proportion of residents named in College complaint cases is low, but that the proportion of CMPA resident members named in College complaints reported to the CMPA has increased in the most recent 10-year study period. As the medico-legal curriculum has traditionally not been a focus of residency programs, our results underscore the need to address College complaints in residency education, and provide guidance to residency programs regarding what to address, in order to potentially improve the quality of clinical practice and mitigate medico-legal risk.

### Implications for Patient Safety

Our results contribute to a growing body of literature demonstrating how complaints data provide important information to improve patient safety.(11-15) While a high proportion of complaints concluded with favorable outcomes for the involved residents, outcomes for physicians are only one part of the story. We highlight that some complaints involved situations of severe patient harm, flagging areas for needed improvements in care settings or in physician training. We advocate for postgraduate medical educational programming that addresses both medico-legal risk mitigation and learning from the patient experience. It is our hope that improving resident medico-legal education offers beneficial downstream effects for understanding patient experiences and improving patient safety culture, particularly in areas such as patient-physician communication, which has been identified as a key underlying cause of patient safety incidents.(25)

### Implications for Professionalism

Despite complainants' common perceptions of poor clinical care, College decisions reflected a theme of clinical problems in only 36/163 cases (22.1%). Furthermore, our thematic analysis indicated a significant proportion of College complaint decisions (63/163; 38.7%) were coded as groundless. This illustrates that although patients and other complainants may feel there has been a particular wrong committed, this is not necessarily affirmed following investigation of the complaint. This finding highlights the

1  
2  
3 potential for mismatch between patient and healthcare provider perceptions of care. Training directed  
4 at enhancing empathy (26) may help resident physicians better understand a patient's position and  
5 perceptions, and could potentially lessen this mismatch, thereby avoiding some of the communication-  
6 related complaints. The importance of empathy is routinely taught in medical school, often as part of  
7 the FIFE (feelings, ideas, functioning, and expectations) model; however, it is not necessarily a similar  
8 area of focus in residency education. The potential importance of this is further underscored by the fact  
9 that residents commonly experience burnout, and any empathy teaching from medical school may be  
10 lost with increasing levels of burnout.(27-28) In addition, a recent systematic review and meta-analysis  
11 found that the presence of burnout amongst health professionals is associated with worsening patient  
12 safety.(29) We believe that activities designed to reduce burnout and increase empathy could also  
13 enhance quality of care and positively impact patient safety.

14  
15  
16  
17  
18  
19  
20  
21  
22  
23  
24  
25  
26  
27  
28 Some residents received severe sanctions, with a few losing or giving up their ability to practice. In  
29 cases where residents received severe sanctions, at least some aspect of the Colleges' decisions always  
30 concerned patient-physician relationship (e.g. communication and respect), professionalism problems  
31 (e.g. deceitful behaviour), or criminal, ethical and boundary issues (e.g. fraud), as opposed to clinical  
32 problems. This finding complements other research that reported surprisingly high levels of  
33 unprofessional, fraudulent and deceitful behaviours amongst resident physicians in the United  
34 States.(30) Even when examining complaints that had educational or remedial dispositions, we found  
35 patient-physician relationship and professionalism problems were more prevalent than clinical problems  
36 in College decisions. This represents another potential educational gap that could be addressed by  
37 targeted interventions to increase awareness regarding the effects poor communication and  
38 unprofessional behaviours have in both prompting College complaints against residents and negatively  
39 impacting College decision outcomes.

1  
2  
3 One American study that found that low professionalism ratings on annual evaluations predicted an  
4 increased risk for disciplinary actions from state licensing boards.(31) This adds further support to the  
5 suggestion that professionalism should be appropriately taught and evaluated in residency education.  
6  
7 We believe strategies at the postgraduate medical education level can help improve resident  
8 professional behavior and the physician-patient relationship, thereby potentially decreasing the chances  
9 of receiving a complaint. Postgraduate educators should also consider that such education strategies  
10 can help support residents to cope with, and manage, complaints when they occur.  
11  
12  
13  
14  
15  
16  
17  
18

### 19 **Implications for Medico-Legal Risk Mitigation**

20  
21 We found that perception of problems with clinical care is the most common reason patients complain  
22 to Colleges about residents. Further, evidence exists that physicians who reported overall participation  
23 in continuing professional development activities were significantly less likely to receive quality of  
24 care-related complaints than those who did not report participating in such activities.(32) We surmise  
25 that allocation of resources during residency on medico-legal education by postgraduate medical  
26 education leaders could lessen the chance their residents will receive a complaint. Of note, the  
27 CanMEDS framework (34) requires knowledge of medico-legal frameworks governing practice as part of  
28 achieving the “Professional” competency.(34) The CMPA offers a Resident Symposium to all Canadian  
29 medical schools focusing on patient safety and medico-legal risk reduction targeted at residents in PGY-  
30 1 and PGY-2 to help address this competency. While current approaches vary across residency  
31 programs, we believe that medico-legal education should be a sustained area of focus throughout the  
32 duration of residency training in order to achieve this particular goal of medical education.  
33  
34  
35  
36  
37  
38  
39  
40  
41  
42  
43  
44  
45  
46  
47

48  
49 Another key finding from our study is that documentation was often criticized by Colleges even when  
50 poor documentation was not an issue in the College complaint. This highlights the need for residency  
51 education programs to impress the importance of clear and appropriate documentation, and teach  
52  
53  
54  
55  
56  
57  
58  
59  
60

1  
2  
3 residents how to document appropriately. Good documentation is critical in mitigating medico-legal  
4  
5 risk.(35-36)  
6  
7

### 8 **Limitations**

9

10 Several limitations to our study should be considered. Some residents, particularly a large proportion  
11  
12 from Quebec, are not CMPA members. Moreover an unknown proportion of others who are CMPA  
13  
14 members may have received College complaints but not voluntarily reported these cases to the CMPA.  
15  
16 The results of the two aforementioned limitations mean our findings likely represent an underestimate  
17  
18 of the total number of College complaints involving Canadian residents. Beyond this, the demographic  
19  
20 data we report were not collected for research purposes, therefore we were unable to report on specific  
21  
22 specialty and other practice characteristics due to confidentiality concerns, as some residency programs  
23  
24 have very small numbers of residents. According to Canadian Post-M.D. Education Registry (CAPER),  
25  
26 residents from the province of Québec made up 23.8% of Canadian residency spots between 2008 and  
27  
28 2017.(37) The lack of information regarding the medico-legal experience of the majority of these  
29  
30 residents undermines the representativeness of our results as a national sample. Additionally, Ontario  
31  
32 had a disproportionately high number of complaints. There can be numerous reasons why these  
33  
34 variations exist, including different decision-making processes amongst Colleges. Therefore, caution  
35  
36 should be taken when extrapolating the summary results to local jurisdictions. We acknowledge that our  
37  
38 College case analysis may also have been negatively influenced by outcome and hindsight biases.(38-41)  
39  
40  
41  
42  
43

### 44 **Conclusion**

45

46 Our study highlights that residents continue to be named in College complaints. Problems with  
47  
48 communication skills and professionalism feature prominently among College complaints experienced  
49  
50 by residents training in Canada. Thematic analysis also demonstrated the potential for mismatch  
51  
52 between patient and healthcare provider perceptions of care. We believe that targeted interventions  
53  
54 focused on non-clinical aspects of training (e.g. professionalism, empathy, documentation), in addition  
55  
56  
57  
58  
59  
60

1  
2  
3 to mitigating resident burnout, have the potential to improve outcomes for patients and decrease both  
4  
5 the number of complaints filed against residents and the severity of outcomes. The improved  
6  
7 understanding of College complaints against residents our study provides has the potential to benefit  
8  
9 patients, residents, educators, and Colleges.  
10  
11  
12  
13  
14  
15  
16  
17  
18  
19  
20  
21  
22  
23  
24  
25  
26  
27  
28  
29  
30  
31  
32  
33  
34  
35  
36  
37  
38  
39  
40  
41  
42  
43  
44  
45  
46  
47  
48  
49  
50  
51  
52  
53  
54  
55  
56  
57  
58  
59  
60

Confidential



1  
2  
3  
4  
5  
6  
7  
8  
9  
10  
11  
12  
13  
14  
15  
16  
17  
18  
19  
20  
21  
22  
23  
24  
25  
26  
27  
28  
29  
30  
31  
32  
33  
34  
35  
36  
37  
38  
39  
40  
41  
42  
43  
44  
45  
46  
47  
48  
49  
50  
51  
52  
53  
54  
55  
56  
57  
58  
59  
60

**Acknowledgements**

The authors acknowledge the following analysts who contributed to data capture, data cleaning, and quality assurance: Anne Steen, Qian Yang, Cathy Zhang, Syeda Faisal, Ria De Gorter, Robert Hudson, and the Canadian Post-M.D. Education Registry (CAPER).

Confidential

## References

1. 2016 Annual Report. Ottawa, ON: Canadian Medical Protective Association; 2017.
2. 2019 Annual Report. Ottawa, ON: Canadian Medical Protective Association; 2020.
3. Moulton D. College complaints to CMPA increase. *CMAJ* 2016 Aug 9;188(11):791-5270.
4. Alam A, Khan J, Liu J, Klemensberg J, Griesman J, Bell CM. Characteristics and rates of disciplinary findings amongst anesthesiologists by professional colleges in Canada. *Can J Anaesth* 2013 Oct;60(10):1013-1019.
5. Alam A, Klemensberg J, Griesman J, Bell CM. The characteristics of physicians disciplined by professional colleges in Canada. *Open Med* 2011;5(4):166.
6. Alam A, Kurdyak P, Klemensberg J, Griesman J, Bell CM. The characteristics of psychiatrists disciplined by professional colleges in Canada. *PLoS One* 2012;7(11):e50558.
7. Alam A, Matelski JJ, Goldberg HR, Liu JJ, Klemensberg J, Bell CM. The Characteristics of International Medical Graduates Who Have Been Disciplined by Professional Regulatory Colleges in Canada: A Retrospective Cohort Study. *Acad Med* 2017 Feb;92(2):244-249.
8. Liu JJ, Alam AQ, Goldberg HR, Matelski JJ, Bell CM. Characteristics of Internal Medicine Physicians Disciplined by Professional Colleges in Canada. *Medicine (Baltimore)* 2015 Jul;94(26):e937.
9. Jeyalingam T, Matelski JJ, Alam AQ, Liu JJ, Goldberg H, Klemensberg J, et al. The Characteristics of Physicians Who are Re-Disciplined by Medical Boards: A Retrospective Cohort Study. *Jt Comm J Qual Patient Saf* 2018 Jun;44(6):361-365.
10. Canadian Medical Protective Association. 2020 (Unpublished report).
11. Donaldson L. An organization with a memory: Learning from adverse events in the NHS. London: Department of Health; 2000.
12. Gillespie A, Reader TW. Patient-centered insights: using health care complaints to reveal hot spots and blind Spots in quality and safety. *Milbank Q.* 2018;96(3):530-567.

- 1  
2  
3 13. Weingart SN, Pagovich O, Sands DZ, Li JM, Aronson MD, Davis RB, et al. What can hospitalized  
4 patients tell us about adverse events? Learning from patient-reported incidents. *J Gen Intern Med.*  
5  
6 2005;20(9):830-836.  
7  
8
- 9  
10 14. de Feijter JM, de Grave WS, Muijtjens AM, Scherpbier AJ, Koopmans RP. A comprehensive overview  
11 of medical error in hospitals using incident-reporting systems, patient complaints and chart review  
12 of inpatient deaths. *PLoS One.* 2012;7(2):e31125.  
13  
14
- 15  
16 15. Pichert JW, Hickson G, Moore I. Using Patient Complaints to Promote Patient Safety. In: Henriksen  
17 K, Battles JB, Keyes MA, Grady ML, editors. *Advances in Patient Safety: New Directions and*  
18  
19 *Alternative Approaches (Vol. 2: Culture and Redesign)* Rockville, MD; 2008.  
20  
21
- 22  
23 16. Bourne T, Vanderhaegen J, Vranken R, Wynants L, De Cock B, Peters M, et al. Doctors' experiences  
24 and their perception of the most stressful aspects of complaints processes in the UK: an analysis of  
25  
26 qualitative survey data. *BMJ Open.* 2016;6(7):e011711.  
27  
28
- 29  
30 17. Wada K, Yoshikawa T, Goto T, Hirai A, Matsushima E, Nakashima Y, et al. Association of depression  
31 and suicidal ideation with unreasonable patient demands and complaints among Japanese  
32  
33 physicians: a national cross-sectional survey. *Int J Behav Med.* 2011;18(4):384-390.  
34  
35
- 36  
37 18. World Health Organization. *International statistical classification of diseases and related health*  
38  
39 *problems. 10th revision, 2010 ed.* Geneva: World Health Organization; 2011.  
40
- 41  
42 19. Canadian Institute for Health Information. *Canadian Classification of Health Interventions.*  
43  
44 Canadian Institute for Health Information. <https://www.cihi.ca/en/codes-and-classifications>.  
45  
46 Accessed September 3, 2019.  
47
- 48  
49 20. Hoppes M, Mitchell JL, Venditti EG, Bunting RF, Jr. Serious safety events: Getting to Zero. *J Healthc*  
50  
51 *Risk Manag.* 2013;32(3):27-45.  
52  
53  
54  
55  
56  
57  
58  
59  
60

- 1  
2  
3 21. McCleery A, Devenny K, Ogilby C, Dunn C, Steen A, Whyte E, et al. Using medicolegal data to  
4 support safe medical care: a contributing factor coding framework. *J Healthc Risk Manag.*  
5  
6 2019;38(4):11-18.  
7
- 8  
9 22. Reader TW, Gillespie A, Roberts J. Patient complaints in healthcare systems: a systematic review  
10 and coding taxonomy. *BMJ Qual Saf.* 2014;23(8):678-689.  
11  
12
- 13 23. Gillespie A, Reader TW. The Healthcare Complaints Analysis Tool: development and reliability  
14 testing of a method for service monitoring and organisational learning. *BMJ Qual Saf.*  
15  
16 2016;25(12):937-946.  
17
- 18 24. Bogh SB, Kerring JH, Jakobsen KP, Hilsøe CH, Mikkelsen K, Birkeland SF. Healthcare Complaints  
19 Analysis Tool: reliability testing on a sample of Danish patient compensation claims. *BMJ Open.*  
20  
21 2019;9(11):e033638.  
22
- 23 25. Vermeir P, Vandijck D, Degroote S, Peleman R, Verhaeghe R, Mortier E, et al. Communication in  
24 healthcare: a narrative review of the literature and practical recommendations. *Int J Clin Pract.*  
25  
26 2015;69(11):1257-1267.  
27
- 28 26. Patel S, Pelletier-Bui A, Smith S, Roberts MB, Kilgannon H, Trzeciak S, et al. Curricula for empathy  
29 and compassion training in medical education: A systematic review. *PLoS One.*  
30  
31 2019;14(8):e0221412.  
32
- 33 27. Dyrbye LN, Burke SE, Hardeman RR, Herrin J, Wittlin NM, Yeazel M, et al. Association of clinical  
34 specialty with symptoms of burnout and career choice regret among US resident physicians. *JAMA.*  
35  
36 2018;320(11):1114-1130.  
37
- 38 28. Ferguson C, Low G, Shiao G. Resident physician burnout: insights from a Canadian multispecialty  
39 survey. *Postgrad Med J.* 2020;96(1136):331-338.  
40  
41
- 42 29. Garcia CL, Abreu LC, Ramos JLS, Castro CFD, Smiderle FRN, Santos, JA, et al. Influence of Burnout on  
43 Patient Safety: Systematic Review and Meta-Analysis. *Medicina.* 2019;55:553.  
44  
45  
46  
47  
48  
49  
50  
51  
52  
53  
54  
55  
56  
57  
58  
59  
60

- 1  
2  
3 30. Fargen KM, Drolet BC, Philibert I. Unprofessional behaviors among tomorrow's physicians: Review  
4 of the literature with a focus on risk factors, temporal trends, and future directions. *Acad Med.*  
5  
6 2016;91(6):858-864.  
7  
8  
9  
10 31. Papadakis MA, Arnold GK, Blank LL, Holmboe ES, Lipner RS. Performance during internal medicine  
11 residency training and subsequent disciplinary action by state licensing boards. *Ann Intern Med.*  
12  
13 2008;148(11):869-876.  
14  
15  
16 32. Wenghofer EF, Campbell C, Marlow B, Kam SM, Carter L, McCauley W. The effect of continuing  
17 professional development on public complaints: a case-control study. *Med Educ.* 2015;49(3):264-  
18  
19 275.  
20  
21  
22  
23 33. Frank JR, Snell L, Sherbino J, editors. *Can Meds 2015 Physician Competency Framework.* Ottawa,  
24  
25 ON: Royal College of Physicians and Surgeons of Canada; 2015.  
26  
27  
28 34. Snell L, Flynn L, Pauls M, Kearney R, Warren A, Sternszus R, et al. In: Frank JR, Snell L, Sherbino J,  
29  
30 editors. *Can Meds 2015 Physician Competency Framework.* Ottawa: Royal College of Physicians and  
31  
32 Surgeons of Canada; 2015.  
33  
34  
35 35. Ward CJ, Green VL. Risk management and medico-legal issues in breast cancer. *Clin Obstet*  
36  
37 *Gynecol.* 2016;59(2):439-446.  
38  
39  
40 36. Klimczak AM, Snyder RR, Borahay MA, Phelps JY. Medicolegal review: Essure lawsuits and legal  
41  
42 strategies adverse to gynecologists. *J Minim Invasive Gynecol.* 2017;24(5):727-730.  
43  
44  
45 37. Association of Faculties of Medicine of Canada. *Canadian Post-M.D. Education Registry (CAPER)*  
46  
47 Ottawa, ON. <https://caper.ca>. Accessed September 6, 2020.  
48  
49  
50 38. Hugh TB, Tracy GD. Hindsight bias in medicolegal expert reports. *Med J Aust.* 2002;176(6):277-278.  
51  
52  
53 39. Annunziata A. Retrospective bias in expert evidence: effects on patient and doctor safety. *Emerg*  
54  
55 *Med Australas.* 2009;21(1):80-83.  
56  
57  
58  
59  
60

1  
2  
3 40. Henriksen K, Kaplan H. Hindsight bias, outcome knowledge and adaptive learning. Qual Saf Health  
4 Care. 2003;12(Suppl 2):ii46-50.  
5  
6  
7  
8 41. Hugh TB, Dekker SW. Hindsight bias and outcome bias in the social construction of medical  
9 negligence: a review. J Law Med. 2009;16(5):846-857  
10  
11  
12  
13  
14  
15  
16  
17  
18  
19  
20  
21  
22  
23  
24  
25  
26  
27  
28  
29  
30  
31  
32  
33  
34  
35  
36  
37  
38  
39  
40  
41  
42  
43  
44  
45  
46  
47  
48  
49  
50  
51  
52  
53  
54  
55  
56  
57  
58  
59  
60

Confidential

## TABLES

**Table 1. Resident and patient demographics, CMPA College complaint cases involving patient care, 2013-2017 (N = 142)**

| <b>Residents*</b>                                                         | <b>N, %</b> |
|---------------------------------------------------------------------------|-------------|
| <b>Resident Postgraduate Year</b>                                         |             |
| 1                                                                         | 25, 17.6%   |
| 2                                                                         | 36, 25.4%   |
| 3                                                                         | 22, 15.5%   |
| 4                                                                         | 18, 12.7%   |
| 5                                                                         | 9, 6.3%     |
| 6                                                                         | 0           |
| Fellow                                                                    | 19.0%       |
| Unknown                                                                   | 14, 9.9%    |
| <b>Resident Specialty (see Appendix 3)</b>                                |             |
| Family medicine                                                           | 22, 15.5%   |
| Surgical                                                                  | 54, 38.0%   |
| Medical                                                                   | 64, 45.1%   |
| Unknown                                                                   | 11, 7.7%    |
| <b>Location of Complaint</b>                                              |             |
| Newfoundland & Labrador, Nova Scotia, Prince Edward Island, New Brunswick | 12, 8.5%    |
| Ontario                                                                   | 101, 71.1%  |
| Quebec, Manitoba, Saskatchewan, Alberta                                   | 21, 14.8%   |
| British Columbia                                                          | 17, 12.0%   |
| Territories                                                               | 0           |
| <b>Resident Age range</b>                                                 |             |
| 24-29                                                                     | 57, 40.1%   |
| 30-34                                                                     | 57, 40.1%   |
| 35-39                                                                     | 24, 16.9%   |
| 40-59                                                                     | 13, 9.2%    |
| <b>Patients</b>                                                           |             |
| <b>Patient Age Range</b>                                                  |             |

|                    |           |
|--------------------|-----------|
| 0-18               | 12, 8.5%  |
| 19-29              | 15, 10.6% |
| 30-49              | 45, 31.7% |
| 50-64              | 27, 19.0% |
| 65-79              | 22, 15.5% |
| 80+                | 8, 5.6%   |
| Unknown            | 16, 11.3% |
| <b>Patient Sex</b> |           |
| Female             | 86, 60.6% |
| Male               | 40, 28.2% |
| Unknown            | 1, 0.7%   |

\* There may be more than 1 resident named in a complaint.

**Table 2. Top 10 Reasons for Complaints, CMPA College complaint cases involving patient care, 2013-2017 (N = 142)**

| <b>Reason for Complaint</b>                | <b>N, %</b> |
|--------------------------------------------|-------------|
| Deficient assessment                       | 69, 48.6%   |
| Diagnostic error                           | 62, 43.7%   |
| Unprofessional manner                      | 41, 28.9%   |
| Communication breakdown, patient           | 32, 22.5%   |
| Failure to perform test/intervention       | 21, 14.8%   |
| Inadequate supervision                     | 16, 11.3%   |
| Inadequate consent process                 | 16, 11.3%   |
| Injury associated with healthcare delivery | 14, 9.9%    |
| Inadequate monitoring or follow-up         | 13, 9.2%    |
| Sexual impropriety                         | 13, 9.2%    |



**Table 3. Contributing factors, CMPA College complaint cases involving patient care, 2013-2017 (N = 53)**

| <b>Provider factor</b>                                                                | <b>Complaints N, %</b> | <b>Example</b>                                                                                                                       |
|---------------------------------------------------------------------------------------|------------------------|--------------------------------------------------------------------------------------------------------------------------------------|
| <b>Clinical Decision-making</b>                                                       | 27, 50.9%              |                                                                                                                                      |
| Thoroughness of assessment                                                            | 19 ; 35.8%             | Failure to obtain detailed history and conduct focused physical exam                                                                 |
| Diagnosis                                                                             | 13, 24.5%              | Failure to reassess in timely manner when condition deteriorates or after giving medications                                         |
| Management errors                                                                     | 7, 13.2%               | Inappropriate disposition or delay or failure to consult with senior residents or staff                                              |
| <b>Lack of Situational Awareness</b>                                                  | 15, 28.3%              |                                                                                                                                      |
| Failure to read patient record                                                        | 6, 11.3%               | Reading patient's previous record would likely have prompted ordering a diagnostic test or led to a different differential diagnosis |
| Lack of self-awareness in resident's knowledge, skill, technique, training, education | 6, 11.3%               | Resident showed poor judgement in not seeking supervisor's assistance prior to performing invasive procedure                         |
| <b>Health, Conduct &amp; Boundary issues<sup>1</sup></b>                              | 20, 37.7%              | Use of cell phone during patient examination                                                                                         |
| <b>Procedural Violations</b>                                                          | 17, 32.1%              | Failure to complete checklist prior to invasive procedure; failure to provide adequate supervision of residents                      |

<sup>1</sup> See Appendix 1 for definition of Health, Conduct & Boundary Issues.

**Table 4. Complaint themes, CMPA College complaint cases (not limited to patient care), 2013-2017 (N = 163)**

| Theme                                     | Number (%) in Complaint | Number (%) in Decision |
|-------------------------------------------|-------------------------|------------------------|
| <b>HCAT* Themes</b>                       |                         |                        |
| Clinical Problem                          | 106 (65.0%)             | 36 (22.1%)             |
| Quality                                   | 96 (58.9%)              | 32 (19.6%)             |
| Safety                                    | 44 (27.0%)              | 24 (14.7%)             |
| Relationship Problem                      | 95 (58.9%)              | 66 (40.1%)             |
| Communication                             | 63 (38.7%)              | 47 (28.8%)             |
| Listening                                 | 11 (6.7%)               | 8 (4.9%)               |
| Respect and patient rights                | 58 (35.6%)              | 40 (63.5%)             |
| Management Problem                        | 5 (3.1%)                | 5 (3.1%)               |
| Environment                               | 1 (0.6%)                | 3 (1.8%)               |
| Institutional Processes                   | 5 (3.1%)                | 3 (1.8%)               |
| <b>Supplementary Themes</b>               |                         |                        |
| Professionalism                           | 67 (41.1%)              | 63 (38.7%)             |
| Physician Conduct                         | 58 (35.6%)              | 42 (25.8%)             |
| Deceit/dishonesty                         | 22 (13.5%)              | 21 (12.9%)             |
| Documentation                             | 10 (6.1%)               | 23 (14.1%)             |
| Criminal, Ethical and Boundary violations | 33 (20.2%)              | 23 (14.1%)             |
| Fraud                                     | 9 (5.5%)                | 9 (5.5%)               |
| Boundary Crossing/Violation               | 18 (11.0%)              | 11 (6.7%)              |
| Other Charge or Investigation             | 13 (8.0%)               | 8 (4.9%)               |
| Inappropriate Prescribing                 | 6 (3.7%)                | 6 (3.7%)               |
| Academic                                  | 6 (3.7%)                | 15 (9.2%)              |
| Failure to Ask for Help                   | 1 (0.6%)                | 5 (3.1%)               |
| Inadequate supervision                    | 6 (3.7%)                | 10 (6.1%)              |
| Groundless                                | N/A                     | 63 (38.7%)             |

There is often more than one subcategory of theme in a case (i.e. subthemes will often add up to greater than the total of the category of theme because a resident was found to have a problem with both listening and communication, for example). **See Appendix 1** for theme definitions.

\*HCAT = Health Communication Assessment Tool, a validated tool for classifying healthcare complaints to inform thematic classification.(22-24)

1  
2  
3  
4  
5  
6  
7  
8  
9  
10  
11  
12  
13  
14  
15  
16  
17  
18  
19  
20  
21  
22  
23  
24  
25  
26  
27  
28  
29  
30  
31  
32  
33  
34  
35  
36  
37  
38  
39  
40  
41  
42  
43  
44  
45  
46  
47  
48  
49  
50  
51  
52  
53  
54  
55  
56  
57  
58  
59  
60

Figure 1. Flow chart of CMPA medico-legal cases from 2013-2017

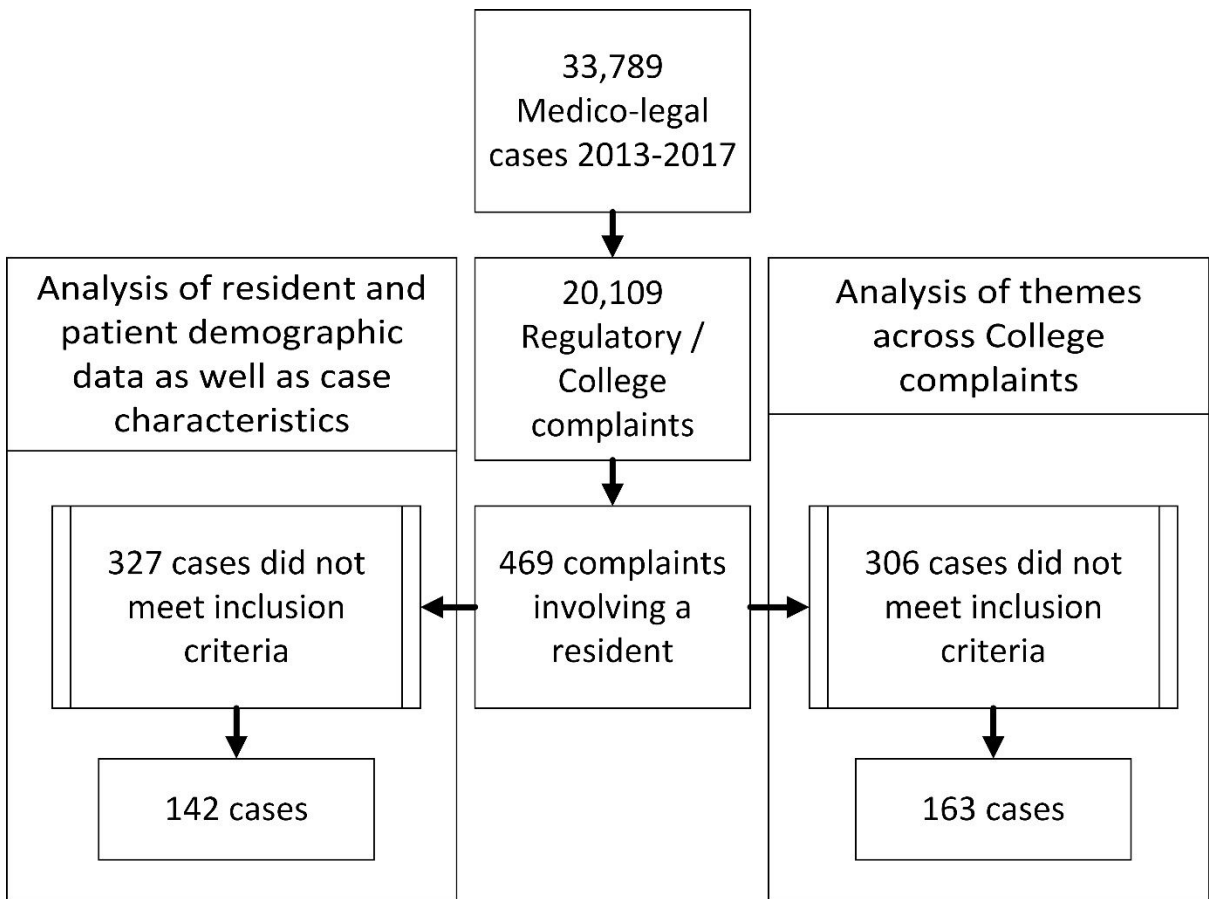

Figure 2. 10-year trend, Number of College Complaint Cases per 1000 members, residents versus all CMPA members

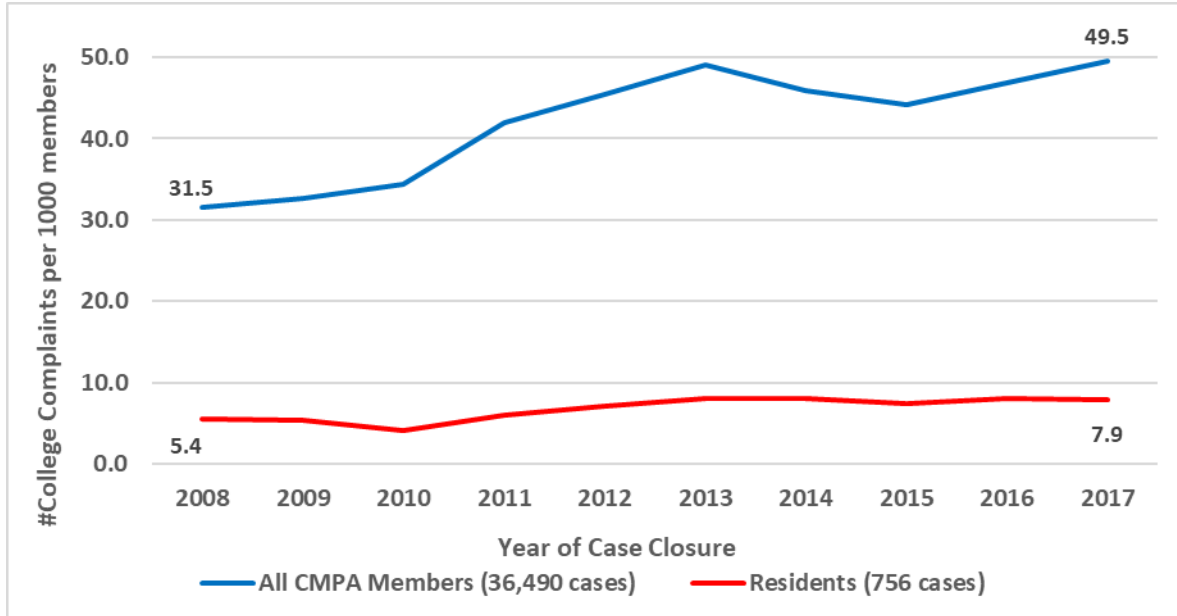

Confidential

## APPENDICES

### Appendix 1

#### Theme Definitions

The following pre-determined themes were agreed upon by the research team and used to **supplement** the HCAT tool themes of clinical problems (quality, safety); management problems (environment, institutional processes); and, relationship problems (listening, communication, respect & patient rights):

- **Professionalism:**
  - **Physician conduct:** Inappropriate language, behavior and manner, including confidentiality breaches.
  - **Deceit/dishonesty:** Misrepresenting or concealing the truth, or telling someone something known to be false. Lesser moral wrongdoing than fraud.
  - **Documentation:** Issues with inadequate and/or non-contemporaneous, or illegible notations in the medical record involving patient assessments; diagnostic plans; pending investigations; consent discussions; management plans.
- **Criminal, Ethical or Boundary Issues:**
  - **Fraud:** Dishonesty intended to result in personal gain (e.g. submitting billings inappropriately, or falsifying documents).
  - **Boundary crossing or violation:** Not respecting the accepted social, physical or psychological space between people and thereby breaching the appropriate therapeutic distance between physician and patient (e.g. an issue with an exam that requires additional sensitivity such as a rectal or vaginal exam, or inappropriate communication or touching). Violations are more serious and usually are harmful and exploitative acts, which can include sexual misconduct.
  - **Other charge or investigation:** Any charge under the *Criminal Code*, RCS 1985, c. C-46 or other legislation (e.g. prescription diversion of opioids or benzodiazepines, driving under the influence).
- **Inappropriate prescribing:** Outside the bounds of what would be considered to be reasonable by most physicians or in violation of accepted guidelines or practice.
- **Groundless:** Patient/complainant feels complaint is warranted, but this issue was not validated in the College's decision (e.g. patient complaints about clinical care but College finds care to be adequate; patient suffered harm but College finds outcome is related to known complication of procedure or pre-existing illness). Also includes frivolous and vexatious claims.

1  
2  
3 • **Academic:**  
4

- 5
- 6 • **Failure to ask for help:** Resident should have asked for help from more senior physician.
  - 7
  - 8 • **Inadequate supervision/guidance:** Resident should have been supervised or had more  
9 guidance from more senior physician.
  - 10

11  
12 **Other terms defined from Tables 2 and 3:**  
13

- 14
- 15 • **Sexual impropriety:** Inappropriate comments with sexual overtones, touching, or intercourse.
  - 16
  - 17 • **Health, Conduct & Boundary issues:**
    - 18 • **Health** refers to physician health (e.g. a physical or mental health problem that was identified  
19 during the College investigation, hence coded based on peer expert opinion).
    - 20
    - 21 • **Conduct** includes inappropriate communication or behavior that is non-sexual (e.g. not listening  
22 or dismissing the patient's concerns, making comments that can appear to be belittling or  
23 judgmental).
    - 24
    - 25 • **Boundary** includes inappropriate physician-patient relationship (e.g. developing friendship).
    - 26
    - 27
    - 28
    - 29
    - 30
    - 31
    - 32
    - 33
    - 34
    - 35
    - 36
    - 37
    - 38
    - 39
    - 40
    - 41
    - 42
    - 43
    - 44
    - 45
    - 46
    - 47
    - 48
    - 49
    - 50
    - 51
    - 52
    - 53
    - 54
    - 55
    - 56
    - 57
    - 58
    - 59
    - 60

1  
2  
3 **Appendix 2**  
4

5 **Harm Classification Table with definitions**  
6

7

| Term             | Description                                                                                                                                                                                                                                                                                 |
|------------------|---------------------------------------------------------------------------------------------------------------------------------------------------------------------------------------------------------------------------------------------------------------------------------------------|
| Harmful incident | Based on peer expert opinion, the harm resulting from the care or services provided to the patient due to failures in the processes of care or in the performance of procedures, including provider error.                                                                                  |
| Inherent risk    | Based on peer expert opinion, a harmful incident that is a known risk associated with a particular investigation, medication, or treatment. It is the risk from undergoing a procedure in ideal conditions, performed by qualified staff using current research, equipment, and techniques. |
| Asymptomatic     | Patient safety event or patient safety incident** that reached the patient but the patient reports no symptoms and no treatment is required.                                                                                                                                                |
| Mild harm        | Patient harm is symptomatic, symptoms are mild, loss of function or harm is minimal (permanent or temporary), and minimal or no intervention is required (e.g., extra observation, investigation, review, or minor treatment).                                                              |
| Moderate harm    | Patient harm is symptomatic, requiring intervention (e.g., additional moderate or minor operative procedure, additional therapeutic treatment), or an increased length of stay, or causing permanent or temporary harm, or loss of function.                                                |
| Severe harm      | Patient harm is symptomatic, requiring life-saving intervention or major medical/surgical intervention, or resulting in a shortening life expectancy, or causing major permanent or temporary harm or loss of function.                                                                     |
| Death            | Health care-related death                                                                                                                                                                                                                                                                   |

8  
9  
10  
11  
12  
13  
14  
15  
16  
17  
18  
19  
20  
21  
22  
23  
24  
25  
26  
27  
28  
29  
30  
31  
32  
33  
34  
35  
36  
37  
38  
39  
40  
41  
42  
43

44 \* Adapted from the American Society for Healthcare Risk Management's *Healthcare Associated Harm Level Classification Tool*. (20)  
45  
46

47 \*\* Patient safety incident: An event or circumstance which could have resulted, or did result, in  
48 unnecessary harm to the patient.  
49  
50  
51  
52  
53  
54  
55  
56  
57  
58  
59  
60

1  
2  
3 **Appendix 3**  
4

5 Specialty Classification:  
6

7 **Surgical specialties:**

8 Anesthesiology  
9 Obstetrics & gynaecology  
10 General surgery  
11 Thoracic surgery  
12 Cardiac surgery  
13 Plastic surgery  
14 Neurosurgery  
15 Orthopaedic surgery  
16 Otolaryngology  
17 Urology  
18 Vascular surgery  
19 Ophthalmology  
20  
21  
22

23 **Medical specialties:**

24 Emergency medicine  
25 Internal medicine  
26 Paediatrics  
27 Gastroenterology  
28 Nephrology  
29 Rheumatology  
30 Psychiatry  
31 Cardiology  
32 Neonatology  
33 Radiation oncology  
34 Neurology  
35 Diagnostic radiology  
36 Dermatology  
37 Respiriology  
38 Hematology  
39 Endocrinology  
40 Critical care  
41  
42  
43

44 **Family medicine:**

45 Family medicine  
46 Public health  
47  
48  
49  
50  
51  
52  
53  
54  
55  
56  
57  
58  
59  
60

Confidential



1  
2  
3 Outcome definitions  
4

5 (1) Dismissed outright. The College took no further action in response to the complaint.  
6

7 (2) Educational or remedial disposition. The complaint is not dismissed outright, but it is not serious  
8 enough to warrant a sanction. Rather, the College sees an opportunity for the member to improve care  
9 by educating the physician (e.g. the member could be a little more careful with documentation). These  
10 outcomes include advice, counsel, remedial agreement, or Specified Continuing Education or  
11 Remediation Programs.  
12

13 (3) Sanction. The College is significantly concerned with the conduct that they require the member to  
14 be cautioned, restrict their practice (i.e. through an undertaking) or be referred to another committee  
15 such as discipline or fitness to practice where they may be subject to a range of sanctions from  
16 suspension to revocation to restrictions on their ability to practice (e.g. chaperone or supervision subject  
17 to reassessment).  
18  
19  
20  
21  
22  
23  
24  
25  
26  
27  
28  
29  
30  
31  
32  
33  
34  
35  
36  
37  
38  
39  
40  
41  
42  
43  
44  
45  
46  
47  
48  
49  
50  
51  
52  
53  
54  
55  
56  
57  
58  
59  
60

Confidential
